# Supplementary material for: Metal free and selective activation of one C–F bond in a bound CF3 group
Source: Royal Society of Chemistry journal article supplement (doi:10.1039/c3cc38669d), 2013-01-01
Supplement: c3cc38669d.pdf [file c3cc38669d.pdf]

## **Supplementary Information**

# Metal Free and Selective Activation of one C–F Bond in a Bound CF<sub>3</sub> Group

*Ramachandran Azhakar, Herbert W. Roesky, \* Hilke Wolf and Dietmar Stalke\**

Institut für Anorganische Chemie der Universität Göttingen, Tammannstrasse 4, 37077

Göttingen, Germany

AUTHOR EMAIL ADDRESS [hroesky@gwdg.de](mailto:hroesky@gwdg.de),

[dstalke@chemie.uni-goettingen.de](mailto:dstalke@chemie.uni-goettingen.de)

## EXPERIMENTAL SECTION

Syntheses were carried out under an inert gas atmosphere of dinitrogen in oven dried glassware using standard Schlenk techniques and other manipulations were accomplished in a dinitrogen filled glove box. Solvents were purified by MBRAUN solvent purification system MB SPS-800. All chemicals were purchased from Aldrich and used without further purification. Compounds **1** and **2** were prepared as reported in the literature.<sup>S1,S2</sup> <sup>1</sup>H, <sup>19</sup>F, and <sup>29</sup>Si NMR spectra were recorded with a Bruker Avance DPX 300, or a Bruker Avance DRX 500 spectrometer, using C<sub>6</sub>D<sub>6</sub> as solvent. Chemical shifts  $\delta$  are given relative to SiMe<sub>4</sub>. EI-MS spectra were obtained using a Finnigan MAT 8230 instrument. Elemental analyses were performed by the Institut für Anorganische Chemie, Universität Göttingen.

**Synthesis of 3.** Toluene (30 mL) was added to a 100 mL Schlenk flask containing **1** (0.35 g, 1.19 mmol) and to this was added PhN=C(CF<sub>3</sub>)<sub>2</sub> (0.29 g, 1.20 mmol) in toluene (30 mL) at room temperature. The reaction mixture was stirred for 6 h. Then it was filtered and the solvent was removed *in vacuo* to 10 mL and stored at -26 °C in a freezer to obtain colorless crystals of **3** (0.51 g, 80%). Elemental analysis (%) calcd for C<sub>24</sub>H<sub>28</sub>ClF<sub>6</sub>N<sub>3</sub>Si (536.03): C, 53.78; H, 5.27; N, 7.84. Found: C, 53.72; H, 5.21; N, 7.78. <sup>1</sup>H NMR (500 MHz, C<sub>6</sub>D<sub>6</sub>, 25 °C):  $\delta$  0.79 (s, 9H, C(CH<sub>3</sub>)<sub>3</sub>), 1.15 (s, 9H, C(CH<sub>3</sub>)<sub>3</sub>), 6.83–7.31 (m, Ar) ppm; <sup>19</sup>F{<sup>1</sup>H} NMR (282.40 MHz, C<sub>6</sub>D<sub>6</sub>, 25 °C):  $\delta$  -60.81 to -60.95 (m, 3F, CF<sub>3</sub>), -72.89 (b, 1F, SiF), -83.60 to -83.78 (m, 1F, CF<sub>2</sub>), -84.52 to -84.73 (m, 1F, CF<sub>2</sub>) ppm; <sup>29</sup>Si{<sup>1</sup>H} NMR (59.63 MHz, C<sub>6</sub>D<sub>6</sub>, 25 °C):  $\delta$  -106.9 ppm ( $J_{\text{SiF}} = 251$  Hz). EI-MS:  $m/z$ : 516 [M<sup>+</sup>-F].

**Synthesis of 4.** Hexane (30 mL) was added to a 100 mL Schlenk flask containing **2** (0.26 g, 0.58 mmol) and to this was added PhN=C(CF<sub>3</sub>)<sub>2</sub> (0.14 g, 0.58 mmol) in hexane (30 mL) at room temperature. The reaction mixture was stirred for 6 h. Then it was filtered and the solvent was reduced *in vacuo* to 20 mL and stored at -26 °C in a freezer to obtain colorless crystals of **4** (0.33 g, 83%). Elemental analysis (%) calcd for C<sub>38</sub>H<sub>45</sub>F<sub>6</sub>N<sub>3</sub>Si (685.86): C,

66.55; H, 6.61; N, 6.13. Found: C, 66.52; H, 6.53; N, 6.97.  $^1\text{H}$  NMR (500 MHz,  $\text{C}_6\text{D}_6$ , 25 °C):  $\delta$  1.08–1.12 (m, 9H,  $\text{CH}(\text{CH}_3)_2$ ), 1.15 (d, 6H,  $J = 7$  Hz,  $\text{CH}(\text{CH}_3)_2$ ), 1.19 (d, 3H,  $J = 7$  Hz,  $\text{CH}(\text{CH}_3)_2$ ), 1.27 (d, 3H,  $J = 7$  Hz,  $\text{CH}(\text{CH}_3)_2$ ), 1.40 (b, 3H,  $\text{CH}(\text{CH}_3)_2$ ), 1.49 (s, 3H,  $\text{NCCCH}_3$ ), 3.25 (m, 2H,  $\text{CH}(\text{CH}_3)_2$ ), 3.37 (s, 1H,  $\text{NCCCH}_2$ ), 3.59 (m, 2H,  $\text{CH}(\text{CH}_3)_2$ ), 4.01 (s, 1H,  $\text{NCCCH}_2$ ), 5.40 (s, 1H,  $\gamma - \text{CH}$ ), 6.72–7.13 (m, 11 H,  $\text{C}_6\text{H}_5$ , 2 x  $i\text{Pr}_2\text{C}_6\text{H}_3$ ) ppm.  $^{19}\text{F}\{^1\text{H}\}$  NMR (282.40 MHz,  $\text{C}_6\text{D}_6$ , 25 °C):  $\delta$  –62.08 to –62.51 (m, 3F,  $\text{CF}_3$ ), –77.19 to –77.34 (m, 1F,  $\text{CF}_2$ ), –80.51 to –80.93 (m, 1F,  $\text{CF}_2$ ), –137.35 (s, 1F,  $\text{SiF}$ ) ppm;  $^{29}\text{Si}\{^1\text{H}\}$  NMR (99.36 MHz,  $\text{C}_6\text{D}_6$ , 25 °C):  $\delta$  –65.1 ppm ( $J_{\text{SiF}} = 286$  Hz). EI-MS:  $m/z$ : 685 [ $\text{M}^+$ ].

**Crystal Structure Determination.** Suitable single crystals for X-ray structural analysis of **3** and **4** were mounted at low temperature in an inert oil under argon atmosphere by applying the X-Temp2 device.<sup>S3</sup> The diffraction data for **3** was collected at 100 K on a Bruker D8 three circle diffractometer equipped with a SMART APEX II CCD detector and a rotating anode with INCOATEC Quazar mirror optics ( $\lambda = 0.71073$  Å). The diffraction data for **4** was collected at 100 K on a Bruker D8 three circle diffractometer equipped with a SMART APEX II CCD detector and an INCOATEC Mo microsource with INCOATEC Quazar mirror optics ( $\lambda = 0.71073$  Å). The data were integrated with SAINT<sup>S4</sup> and an empirical absorption correction with SADABS<sup>S5</sup> was applied. The structures were solved by direct methods (SHELXS-97) and refined against all data by full-matrix least-squares methods on  $F^2$  (SHELXL-97).<sup>S6</sup> All non-hydrogen-atoms were refined with anisotropic displacement parameters. The hydrogen atoms were refined isotropically on calculated positions using a riding model with their  $U_{\text{iso}}$  values constrained to 1.5  $U_{\text{eq}}$  of their pivot atoms for terminal  $\text{sp}^3$  carbon atoms and 1.2 times for all other carbon atoms. The disordered groups in **4** are refined with distance restraints and restraints for the anisotropic displacement parameters.

**Table 1.** Crystal and Structure Refinement parameters for compounds **3** and **4**.

| Parameters                                          | <b>3</b>                                                                                               | <b>4</b>                                                                      |
|-----------------------------------------------------|--------------------------------------------------------------------------------------------------------|-------------------------------------------------------------------------------|
| Empirical formula                                   | C <sub>24</sub> H <sub>28</sub> ClF <sub>6</sub> N <sub>3</sub> Si                                     | C <sub>38</sub> H <sub>45</sub> F <sub>6</sub> N <sub>3</sub> Si              |
| Formula Weight                                      | 536.03                                                                                                 | 685.86                                                                        |
| Crystal system                                      | monoclinic                                                                                             | orthorhombic                                                                  |
| Space group                                         | <i>P2<sub>1</sub>/n</i>                                                                                | <i>Pnma</i>                                                                   |
| Unit cell dimensions                                | <i>a</i> = 10.617 (2) Å<br><i>b</i> = 16.479 (3) Å<br><i>c</i> = 14.578 (2) Å<br><i>β</i> = 93.59 (2)° | <i>a</i> = 16.937 (6) Å<br><i>b</i> = 20.574 (6) Å<br><i>c</i> = 10.082 (4) Å |
| Volume, <i>Z</i>                                    | 2545.5 (8) Å <sup>3</sup> , 4                                                                          | 3513 (2) Å <sup>3</sup> , 4                                                   |
| Density (Calculated)                                | 1.399 g/cm <sup>3</sup>                                                                                | 1.297 g/cm <sup>3</sup>                                                       |
| Absorption coefficient                              | 0.259 mm <sup>-1</sup>                                                                                 | 0.130 mm <sup>-1</sup>                                                        |
| <i>F</i> (000)                                      | 1112                                                                                                   | 1448                                                                          |
| Crystal size [mm <sup>3</sup> ]                     | 0.10 x 0.10 x 0.05                                                                                     | 0.02 x 0.02 x 0.01                                                            |
| <i>θ</i> range for data collection                  | 1.87 to 25.36°                                                                                         | 1.98 to 21.27°                                                                |
| Limiting indices                                    | -12 ≤ <i>h</i> ≤ 12,<br>-19 ≤ <i>k</i> ≤ 19,<br>-17 ≤ <i>l</i> ≤ 17                                    | -17 ≤ <i>h</i> ≤ 17,<br>-20 ≤ <i>k</i> ≤ 20,<br>-10 ≤ <i>l</i> ≤ 10           |
| Reflections collected                               | 18144                                                                                                  | 15989                                                                         |
| Independent reflections                             | 4661 ( <i>R</i> <sub>int</sub> = 0.0441)                                                               | 2024 ( <i>R</i> <sub>int</sub> = 0.0505)                                      |
| Completeness to <i>θ</i>                            | 100% ( <i>θ</i> = 25.36)                                                                               | 99.9% ( <i>θ</i> = 21.27)                                                     |
| Refinement method                                   | Full - matrix least - squares<br>on <i>F</i> <sup>2</sup>                                              | Full - matrix least - squares<br>on <i>F</i> <sup>2</sup>                     |
| Data/ restraints/ parameters                        | 4661 / 0 / 322                                                                                         | 2024 / 176 / 288                                                              |
| Goodness - of - fit on <i>F</i> <sup>2</sup>        | 1.042                                                                                                  | 1.055                                                                         |
| Final <i>R</i> indices [ <i>I</i> > 2σ( <i>I</i> )] | <i>R</i> <sub>1</sub> = 0.0399, <i>wR</i> <sub>2</sub> = 0.0839                                        | <i>R</i> <sub>1</sub> = 0.0388, <i>wR</i> <sub>2</sub> = 0.0902               |
| <i>R</i> indices (all data)                         | <i>R</i> <sub>1</sub> = 0.0652, <i>wR</i> <sub>2</sub> = 0.0904                                        | <i>R</i> <sub>1</sub> = 0.0548, <i>wR</i> <sub>2</sub> = 0.0971               |
| <i>g</i> <sub>1</sub> , <i>g</i> <sub>2</sub>       | 0.0413, 0.4441                                                                                         | 0.0447, 2.8243                                                                |
| Largest diff. peak and hole                         | 0.251 and -0.311 eÅ <sup>-3</sup>                                                                      | 0.204 and -0.229 eÅ <sup>-3</sup>                                             |

## References

- S1. S. S. Sen, H. W. Roesky, D. Stern, J. Henn and D. Stalke, *J. Am. Chem. Soc.*, 2010, **132**, 1123–1126.
- S2. M. Driess, S. Yao, M. Brym, C. van Wüllen and D. Lentz, *J. Am. Chem. Soc.*, 2006, **128**, 9628–9629.
- S3. (a) D. Stalke, *Chem. Soc. Rev.*, 1998, **27**, 171-178; (b) T. Kottke and D. Stalke, *J. Appl. Crystallogr.*, 1993, **26**, 615-619.
- S4. SAINT V7.68A in Bruker APEX, version 2011.9, Bruker AXS Inst. Inc., Madison, Wisconsin (USA) 2008.
- S5. Sheldrick, G. M. *SADABS 2008/2*, Universität Göttingen, Germany, 2008.
- S6. (a) G. M. Sheldrick, *Acta Cryst.*, 1990, **A46**, 467–473; (b) G. M. Sheldrick, *Acta Cryst.*, 2008, **A64**, 112–122; (c) P. Müller, R. Herbst-Irmer, A. L. Spek, T. R. Schneider and M. R. Sawaya, *In Crystal Structure Refinement – A Crystallographer’s Guide to SHELXL*, IUCr Texts on Crystallography; Müller, P., Ed.; Oxford University Press: Oxford, U.K., 2006; Vol. 8; (d) C. B. Hübschle, G. M. Sheldrick and B. Dittrich, *J. Appl. Crystallogr.*, 2011, **44**, 1281–1284.
